# Supplementary material
Source: PubMed Central journal article supplement (PMC8651254)
Supplement: mmc1.pdf [file mmc1.pdf]

# THE LANCET

## Infectious Diseases

### Supplementary appendix 1

This translation in Chinese was submitted by the authors and we reproduce it as supplied. It has not been peer reviewed. *The Lancet's* editorial processes have only been applied to the original in English, which should serve as reference for this manuscript.

Supplement to: Zeng G, Wu Q, Pan H, et al. Immunogenicity and safety of a third dose of CoronaVac, and immune persistence of a two-dose schedule, in healthy adults: interim results from two single-centre, double-blind, randomised, placebo-controlled phase 2 clinical trials. *Lancet Infect Dis* 2021; published online Dec 6. [https://doi.org/10.1016/S1473-3099\(21\)00681-2](https://doi.org/10.1016/S1473-3099(21)00681-2).

此简体中文译文由作者提交，我方按照提供的版本刊登。此译文并未经过同行审阅。医学期刊《柳叶刀》的编辑流程仅适用于英文原稿，英文原稿应作为此手稿的参考。

## 研究背景

全球多国正在使用新冠灭活疫苗 CoronaVac 开展大规模人群接种。本研究旨在评估 18 岁及以上的健康成年人接种两剂次 CoronaVac 的免疫持久性，以及接种第三剂次 CoronaVac 的免疫原性和安全性。

## 研究方法

本研究包括两个单中心、双盲、随机、安慰剂对照的二期临床试验。一项在中国江苏省 18-59 岁成年人中开展，受试者按照 1:1 的比例分入 0/14 天免疫程序队列 (cohort 1) 和 0/28 天免疫程序队列 (cohort 2)，再按照 2:2:1 的比例随机分配至 3 $\mu$ g 剂量疫苗组、6 $\mu$ g 剂量疫苗组或安慰剂组。经 2020 年 12 月 25 日修订研究方案后，上述各试验组的一半受试者在接种第二剂次后 28 天 (窗口期 30 天) 接种第三剂次，另一半在接种第二剂次后 6 个月 (窗口期 60 天) 接种第三剂次。另一项研究在中国河北省 60 岁及以上成年人中开展，受试者依次接种三剂次 1.5 $\mu$ g 疫苗、3 $\mu$ g 疫苗、6 $\mu$ g 疫苗或安慰剂；前两剂次接种间隔 28 天，第二、三剂次接种间隔为 6 个月 (窗口期 90 天)。研究的主要结局指标为针对新冠病毒 (SARS-CoV-2/human/CHN/CN1/2020, GenBank number MT407649.1) 的中和抗体几何平均滴度 (GMTs)、几何平均增量 (GMIs) 和血清阳性率，按符合方案集进行分析 (即完成接种第三剂次的受试者)。因为 3 $\mu$ g 是获批剂量，本研究主要报告该组的结果。研究已在 ClinicalTrials.gov 网站登记，注册号为 NCT04352608 和 NCT04383574。

## 研究结果

在 600 名 18 至 59 岁的受试者中，有 540 人（90%）接种了第三剂次，其中 269 人（50%）在接种第二剂次 2 个月后接种第三剂次（cohort 1a-14d-2m 和 cohort 2a-28d-2m），271 人（50%）在接种第二剂次 8 个月后接种加强剂次（cohort 1b-14d-8m 和 cohort 2b-28d-8m）。在 3 $\mu$ g 组中，前两剂次诱导的中和抗体水平在 6 个月后下降至接近或低于血清阳性阈值（1: 8）：cohort 1b-14d-8m（n=53, GMT 3.9 [95%CI 3.1-5.0]）；cohort 2b-28d-8m（n=49, 6.8 [95%CI 5.2-8.8]）。在第二剂次 8 个月后接种加强针，cohort 1b-14d-8m 接种加强针 14 天后 GMT 增加至 137.9（95%CI 99.9-190.4），cohort 2b-28d-8m 接种加强针 28 天后 GMT 增加至 143.1（95% CI 110.8-184.7）。在接种第二剂次 2 个月后接种第三剂次，可以轻度升高中和抗体水平：cohort 1a-14d-2m（n=54）GMT 从第二剂次后 28 天的 21.8（95%CI 17.3-27.6）增加至第三剂次后 28 天的 45.8（95%CI 35.7-58.9），cohort 2a-28d-2m（n=53）GMT 从 38.1（95%CI 28.4-51.1）增加至 49.7（95%CI 39.9-61.9）。接种第三剂次 6 个月后，GMT 均衰减至接近阳性阈值（cohort 1a-14d-2m GMT 为 9.2 [95%CI 7.1-12.0]；cohort 2a-28d-2m GMT 为 10.0 [95%CI 7.3-13.7]）。在接种了加强针的 60 岁及以上人群中（n=303），两剂次基础免疫 6 个月后中和抗体滴度下降到接近或低于血清阳性阈值。第二剂次 8 个月后接种第三剂次可以显著提高中和抗体水平（n=29）：GMT 从第二剂次 28 天后的 42.9（95%CI 31.0-59.4）升高至第三剂次 28 天后 158.5（95% CI 96.6-259.2）。在所有疫苗组中，第三剂次后 28 天内报告的不良反应严重程度均为 1 或 2 级。Cohort 1a-14d-2m 的 150 名受试者共报告 3 起（2%）严重不良事件，cohort 1b-14d-8m 的 150 名受试者共报告 4 起（3%），cohort 2a-28d-2m 和 cohort 2b-28d-8m 的各 150 名受试者分别报告

了 1 起（1%）；cohort 3-28d-8m 的 349 名受试者报告了 24 起（7%）。

## 研究结论

接种 CoronaVac 第二剂次后 6 个月，疫苗诱导的中和抗体水平大幅下降，在完成两剂次基础免疫 8 个月后接种第三剂次可以有效诱导特异性免疫反应，中和抗体水平显著升高，表明两剂次基础免疫能够产生良好的免疫记忆。和两剂次基础免疫方案相比，在完成基础免疫 2 个月后接种第三剂次可以使中和抗体水平轻度升高。
