# Supplementary material
Source: PubMed Central journal article supplement (PMC8651254)
Supplement: mmc4.pdf [file mmc4.pdf]

# THE LANCET

## Infectious Diseases

### Supplementary appendix 4

This appendix formed part of the original submission and has been peer reviewed. We post it as supplied by the authors.

Supplement to: Zeng G, Wu Q, Pan H, et al. Immunogenicity and safety of a third dose of CoronaVac, and immune persistence of a two-dose schedule, in healthy adults: interim results from two single-centre, double-blind, randomised, placebo-controlled phase 2 clinical trials. *Lancet Infect Dis* 2021; published online Dec 7. [https://doi.org/10.1016/S1473-3099\(21\)00681-2](https://doi.org/10.1016/S1473-3099(21)00681-2).

## Table of Contents

|                                                                                                                                                    |           |
|----------------------------------------------------------------------------------------------------------------------------------------------------|-----------|
| <b>Supplemental Methods</b> .....                                                                                                                  | <b>3</b>  |
| Exclusion criteria for the administration of the second and third dose.....                                                                        | 3         |
| Trial profile in the protocol.....                                                                                                                 | 4         |
| Detection Method of Neutralization Potency against Live SARS-CoV-2.....                                                                            | 5         |
| Study endpoints list.....                                                                                                                          | 6         |
| Members of Independent Data Monitoring Committee.....                                                                                              | 8         |
| Descriptions of retest results for the older adults.....                                                                                           | 9         |
| Vaccination intervals between the second dose and third dose.....                                                                                  | 12        |
| <b>Supplemental Flowcharts</b> .....                                                                                                               | <b>13</b> |
| <b>Supplemental Results of Immunogenicity</b> .....                                                                                                | <b>16</b> |
| Table S1. Six-month immune persistence after primary three-dose regimen of CoronaVac in adults (immune-persistence analysis set).....              | 16        |
| Table S2. Six-month immune persistence after two doses of CoronaVac in adults (immune-persistence analysis set).....                               | 18        |
| Table S3. Six-month immune persistence after two doses of CoronaVac in older adults (immune-persistence analysis set).....                         | 20        |
| Table S4. Comparison of neutralising antibody levels induced by dose 3 among the four groups in adults aged 18-59 years old (cohorts 1 and 2)..... | 21        |
| <b>Supplemental Results of safety</b> .....                                                                                                        | <b>22</b> |
| Table S5. Adverse reactions reported within 28 days post each dose for Cohort 1a-14d-2m.....                                                       | 22        |
| Table S6. Adverse reactions reported within 28 days after the third dose for Cohort 1b-14d-8m.....                                                 | 24        |
| Table S7. Adverse reactions reported within 28 days post each dose for Cohort 2a-28d-2m.....                                                       | 25        |
| Table S8. Adverse reactions reported within 28 days after the third dose for Cohort 2b-28d-8m.....                                                 | 27        |
| Table S9. Adverse reactions reported within 28 days after the third dose for Cohort 3-28d-8m.....                                                  | 28        |
| Table S10. Serious adverse events reported in adults aged 18-59 years old.....                                                                     | 29        |
| Table S11. Serious adverse events reported in adults aged 60 years and older                                                                       |           |

(cohort 3-28d-8m) ..... 31

## Supplemental Methods

### Exclusion criteria for the administration of the second and third dose

- **Continuing vaccination is prohibited, and other research steps may continue according to researchers' judgement if:**
  - (1) A COVID-19 vaccine other than the experimental vaccine was used during the study period;
  - (2) Any serious adverse reaction with causality assessed as vaccine caused;
  - (3) Severe anaphylaxis or hypersensitivity after vaccination (including urticaria / rash within 30 minutes after vaccination);
  - (4) Any confirmed or suspected autoimmune or immunodeficiency disease, including human immunodeficiency virus (HIV) infection;
  
- **Vaccination can be postponed within the time window specified in the program if:**
  - (5) Acute or new chronic disease occurs after vaccination;
  - (6) Other reactions (including severe pain, severe swelling, severe activity limitation, persistent high fever, severe headache or other systemic or local reactions) as judged by the investigator;
  
- **Vaccination can be postponed within the time window specified in the protocol if:**
  - (7) At the time of vaccination, the participant was suffering from acute disease (acute disease refers to moderate or severe disease with or without fever);
  - (8) The axillary temperature was higher than 37.0°C;
  - (9) Participants were vaccinated with a (non-Covid-19) subunit vaccine or inactivated vaccine within 7 days or a live, attenuated vaccine within 14 days;
  - (10) According to the judgment of the investigator, the participant had any factors not suitable for vaccination.

## Trial profile in the protocol

### Cohort 1a (Booster at Month 2)

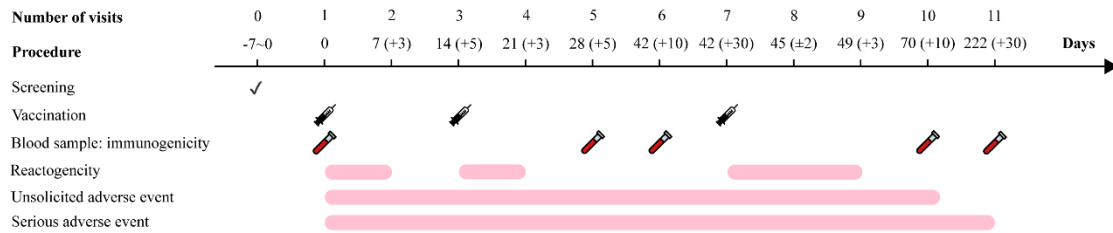

### Cohort 1a (Booster at Month 8)

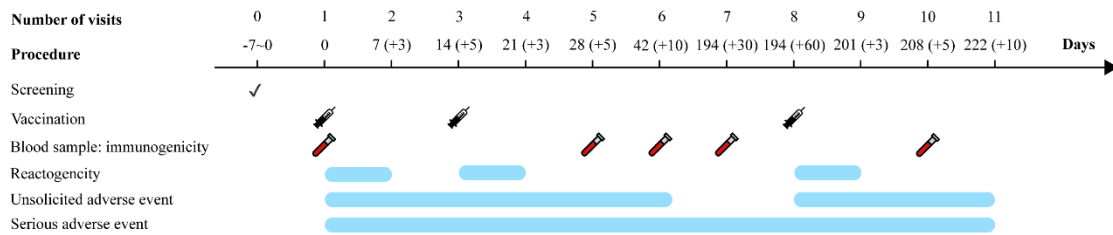

### Cohort 1b (Booster at Month 2)

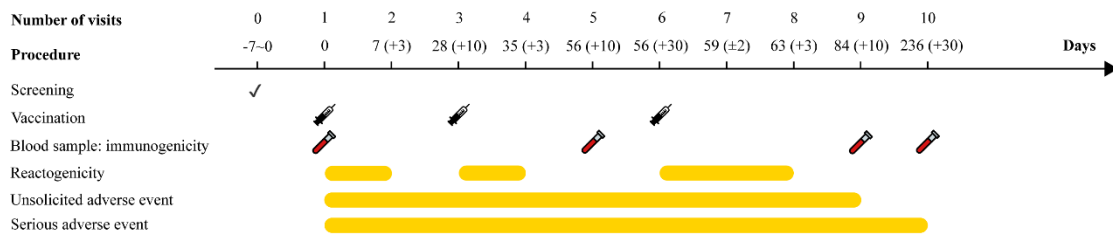

### Cohort 1b (Booster at Month 8)

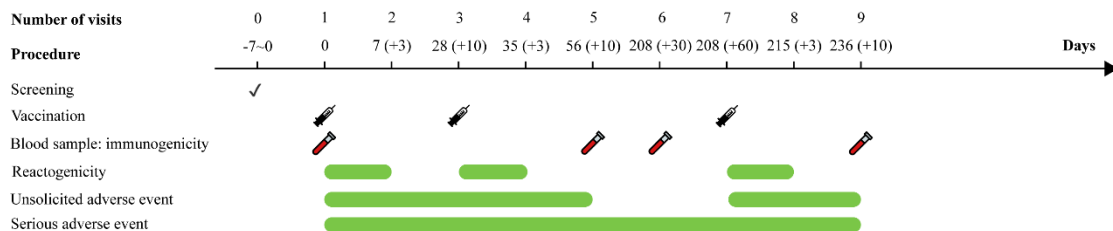

### Cohort 2

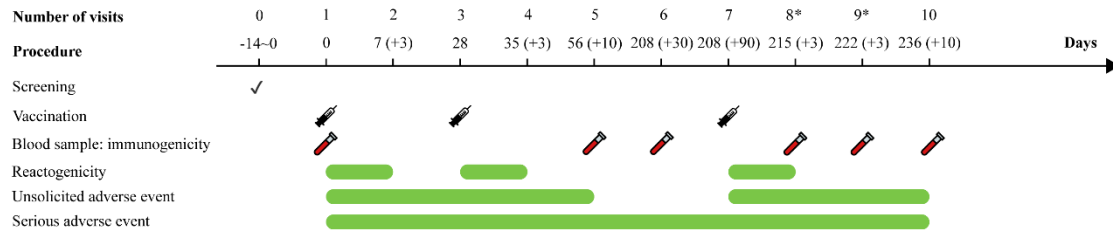

Note: The time window for each visit specified in the protocol is indicated in brackets.

In **Cohort 1a**, routine hematological and biochemical tests were performed for the first 30 participants before dose 3 and within 3 days after dose 3. Participants would not be assigned a third dose if the severity of hematology and biochemistry indexes was grade 2 or more.

## Detection Method of Neutralization Potency against Live SARS-CoV-2

Micro cytopathic effect assay was adopted.

**Serum treatment:** all serum samples were inactivated at 56°C in a water bath for 30 minutes.

**Medium addition:** the cell maintenance medium was added to the cell control group at 100 µL/well, and 50 µL/well of maintenance medium was supplemented to the to-be-tested serum group, virus back titration group and positive control group from the second dilution.

**Dilution of the serum sample:** The serum was diluted four-fold (60 µL sample + 180 µL maintenance medium) with cell maintenance medium (2% newborn calf serum-199 (2% sodium hydrogen carbonate) cell maintenance medium). The diluted serum was added to the cell plate at 100 µL/well, and each sample was diluted to 2 wells in parallel. 50 µL of the mixture in the first dilution was pipetted into the next dilution, and the mixture was pipetted up and down for 8-10 times. The mixture was diluted to the appropriate dilution range by this method, and 50 µL of the last dilution was discarded, and 50 µL of the diluted sample was retained in each well.

**Dilution of the virus for neutralization:** the SAR-CoV-2 used for neutralization was diluted to 100CCID<sub>50</sub>/0.05ml by titer.

**Neutralization:** Serum of different dilutions was mixed with 100CCID<sub>50</sub>/0.05ml virus liquid in equal volume (50 µL+50 µL), respectively, and then incubated in an incubator at 36.5°C, 5%CO<sub>2</sub> for 2h.

**Experimental control:** Negative serum control, positive serum control, serum sample and cell control were set simultaneously.

**Virus Back Titration:** The virus suspension diluted to 100 CCID<sub>50</sub>/0.05 mL was diluted via ten-fold serial dilution, i.e. diluted to 10 CCID<sub>50</sub>/0.05 mL, 1 CCID<sub>50</sub>/0.05 mL and 0.1 CCID<sub>50</sub>/0.05 mL, and added to the 96-well cell plate respectively, 12 well per dilution and 50 µL per well, then 50 µL of cell maintenance medium was added to each well, and the plate was incubated in an incubator at 36.5°C, 5% CO<sub>2</sub> for 5 days. Cell Inoculation and Culture: After incubation, 100µL of Vero cell suspension (cell concentration: 1.0-2.0×10<sup>5</sup> cell/mL) was added to each well, and then incubated in an incubator at 36.5°C, 5% CO<sub>2</sub> for 5 days.

**Interpretation of the Results:** It was observed for the cytopathic effect after cultured for 3-5 days, and the neutralizing antibody titer of the to-be-tested serum sample was determined according to the observation results of the cytopathic effect (CPE). The reciprocal of the highest serum dilution without cytopathic effects the end titer. When 1 of the 2 wells of the highest dilution serum shows CPE, while the other does not, the reciprocal of the dilution should be the neutralizing antibody titre of the serum specimen; the reciprocal of the mean dilution of the two wells should be the neutralizing antibody titre of the serum specimen when the 2 wells with the highest dilution are completely pathological while the adjacent 2 wells with low dilution are not pathological completely; when 1 of two adjacent wells is pathological while the other not, the reciprocal of the average dilutions of 2 wells should be the neutralizing antibody titer of the serum specimen. For example, 2 wells with high dilution of 1:8 have a complete CPE, while the adjacent 2 wells with low dilution of 1:16 have no CPE; or in 2 adjacent wells with dilutions of 1:8 and 1:16, one has a CPE, while the other does not. In this case, the reciprocal 12 of the average dilutions of 2 wells is the neutralizing antibody titer of the serum.

## **Study endpoints list**

### **Phase 2 trial among adults aged 18-59 years old**

#### **Primary endpoint**

- Positive conversion rate of serum neutralizing antibody on Day 14 (**Cohort 1**)/Day 28 (**Cohort 2**) after two doses of test vaccine;
- Incidence of adverse reaction on Day 0-28 (Day 0-14 for the first dose for **Cohort 1**) after each dose;

#### **Secondary endpoint**

- Positive rate, GMT and GMI of serum neutralizing antibody on Day 28 after two doses of test vaccine;
- Positive conversion rate, positive rate, GMT and GMI of serum neutralizing antibody on Day 28 after three doses of test vaccine (only for **Cohort 1a-14d-2m** and **Cohort 2a-28d-2m**);
- Incidence of adverse reactions 0-7 days after each dose of vaccination;
- Incidence of serious adverse event from the inoculation to 6 months after full course vaccination;

#### **Exploratory Endpoints**

- The seropositive rate and GMT of neutralizing antibody at 6 months after the second dose (only for **Cohort 1b-14d-8m** and **Cohort 2b-28d-8m**);
- The seropositive rate, GMT, and GMI of neutralizing antibody at 12 months after the third dose (only for **Cohort 1a-14d-2m** and **Cohort 2a-28d-2m**);
- The seropositive rate and GMT of neutralizing antibody at 14 days (only for **Cohort 1b-14d-8m**) or 28 days (only for **Cohort 2b-28d-8m**) after the booster dose;
- The seropositive rate and GMT of neutralizing antibody at 6 months after the booster (only for **Cohort 1b-14d-8m** and **Cohort 2b-28d-8m**).

### **Phase 2 trial among adults aged 60 years and older**

#### **Primary Endpoint**

- Incidence of adverse reactions within 28 days after each dose of vaccination;
- The seroconversion rate of neutralizing antibodies 28 days after the second dose vaccination.

**Secondary Endpoint**

- Incidence of adverse reactions within 7 days after each dose vaccination;
- Incidence of SAEs from the beginning of the vaccination to 12 months after booster immunization;
- The seropositive rate, GMT, and GMI of neutralizing antibodies 28 days after the second dose vaccination;

**Exploratory Endpoint**

- The seropositive rate and GMT 6 months after the second dose vaccination;
- The seropositive rate, GMT, and GMI 28 days after the booster vaccination;
- The seropositive rate and GMT 6 months after the booster vaccination;
- The seropositive rate and GMT 12 months after the booster vaccination.



### Members of Independent Data Monitoring Committee

| <b>Name</b>  | <b>Specialist</b> | <b>Affiliation</b>                                                               |
|--------------|-------------------|----------------------------------------------------------------------------------|
| Jielai Xia   | Biostatistics     | Air Force Medical University                                                     |
| Huaqing Wang | Epidemiology      | National Immunization Program, Chinese Center for Disease Control and Prevention |
| Fujie Zhang  | Clinical Medicine | Beijing Ditan Hospital                                                           |

## **Descriptions of retest results for the older adults**

A range of measures were taken to control the quality of neutralization tests in our study as follows:

**Back titration:** Due to the SARS-CoV-2 was an unprecedented virus emerged in the world, standardized neutralization test process has not been established for SARS-CoV-2. As one of the most commonly used and the most reliable methods for quantifying antibodies against a selected virus, neutralization tests are the gold-standard assay for the poliovirus. Based on the standardize virus neutralization methods to measure antibody levels against poliovirus in human sera released by WHO [Polio laboratory manual 4th edition, 2004. World Health Organization, Geneva, Switzerland], we conducted the back titration for confirming the amount of virus used in each test was within the range 32 - 320 TCID<sub>50</sub>/50 µl.

**Positive antibody control:** Two kinds of positive antibody control were set up for each time of our experiment, the antibody titer value of positive control used between batches are stable and reasonable. The positive antibody controls were selected as anti-goat antibody (titre range: 1024-4096) and human serum (XGR, titre range: 64-256). Anti-goat antibody was generated by immunizing goats with purified SARS-CoV-2. Human serum was generated from convalescent plasma of COVID-19 patients.

**Negative antibody control:** Negative antibody control were set up for each time of our experiment, the antibody titer value of negative control used between batches are stable and reasonable. The negative serum control was selected as rat serum. Rat serum was obtained from non-immunized rats by centrifugation.

**Serum toxicity control:** Serum toxicity was determined by incubation of the lowest serum dilution (1:2) with cells without virus. Serum toxicity control was set for each sample.

**Cell control:** Cell control wells comprising cells alone were set up for each time of our

experiment.

Immunogenicity of CoronaVac was evaluated in younger adults and older adults, separately. Four vaccination schedules were assessed in the younger adults (18-59 years old) and one vaccination schedule was assessed in the older adults (aged 60 years and older). The immunogenicity was evaluated by neutralizing antibodies against SARS-CoV-2 (virus strain SARS-CoV-2/human/CHN/CN1/2020, GenBank number MT407649.1) which were quantified using a micro-cytopathogenic effect assay.

Specimens obtained on day 28 after the second dose had been tested previously, and the neutralizing antibody titres were comparable between younger adults (18 to 59 years of age) and older adults (60 years of age or above). However, neutralizing antibody titres of sera obtained on day 28 after the third dose from older adults was approximately two-fold higher (**Cohort 3 b-28d-8m**) compared with titres from younger adults (**Cohort 2b-28d-8m**) who had been immunized with the same vaccination schedules [GMT: 143.1 (95%CI 110.8-184.7) in the younger adults, 342.8 (95%CI 266.4-441.1) in the older adults], which was in contrast with the pattern of other vaccines and the knowledge of young adults with more powerful immune response capacity. To verify the stability and reliability of neutralizing antibody test results, we retested convenience samples of specimens from 100 younger adults and 100 older adults. Pairwise comparison was conducted between neutralization results of initial-testing and re-testing and results were shown below:

| Group          | Test         | GMT (95%CI)        | Pairwise group t-test (P value) | Cohen's kappa test (p value) |
|----------------|--------------|--------------------|---------------------------------|------------------------------|
| Younger adults | Initial-test | 77.8 (51.4-117.7)  | 0.76                            | 0.68                         |
|                | Re-test      | 71.1 (47.8-105.9)  |                                 |                              |
| Older adults   | Initial-test | 146.8 (99.2-217.4) | 0.02                            | <0.001                       |
|                | Re-test      | 77.3 (53.8-111.2)  |                                 |                              |

For younger adults, the neutralizing antibody titres were similar with these two tests. Accordingly, the results of the first test for this population were used in our analysis. For older adults, the neutralizing antibody titre were significantly lower in the re-tests. We evaluated our protocol and data recording steps to ensure data correctness. The evaluation showed procedures consistent with the protocol. It is not possible to judge with certainty which result is more reliable.

In addition, the comparison results of demographics of the total participants included in the initial immunogenicity and selected participants were shown as below, which indicated that there were no significant differences. Considering the acceptable results of serum samples between younger adults and older adults in the retests, we used the retest results of 100 older adults, which we believe to be more reliable, in our analyses. Due to repeated freezing and thawing, and insufficient sera, we were unable to retest specimens from the other older adults. Excluding two participants who were vaccinated mistakenly, there were a total of 98 participants included in the immunogenicity analysis of third dose in older age group.

|                   | Total    | Sample   | P value |
|-------------------|----------|----------|---------|
| <b>1.5 µg</b>     |          |          |         |
| N                 | 82       | 28       | —       |
| Age (Mean±SD)     | 66.3±4.4 | 66.3±4.5 | 0.98    |
| Sex (Male/Female) | 44/38    | 14/14    | 0.91    |
| <b>3 µg</b>       |          |          |         |
| N                 | 87       | 29       | —       |
| Age (Mean±SD)     | 66.4±4.4 | 67.2±4.9 | 0.49    |
| Sex (Male/Female) | 46/41    | 14/15    | 0.83    |
| <b>6 µg</b>       |          |          |         |
| N                 | 78       | 28       | —       |
| Age (Mean±SD)     | 66.3±4.4 | 67.0±5.2 | 0.57    |
| Sex (Male/Female) | 42/36    | 16/12    | 0.94    |
| <b>Placebo</b>    |          |          |         |
| N                 | 42       | 13       | —       |
| Age (Mean±SD)     | 67.2±4.8 | 67.0±4.5 | 0.91    |
| Sex (Male/Female) | 17/25    | 4/9      | 0.76    |

**Vaccination intervals between the second dose and third dose**

|                         | No of participants received the third dose | Actual interval and corresponding number of participants                | No of participants received the third dose out of window (protocol violation) | Mean  | Median | IQR     | Range   |
|-------------------------|--------------------------------------------|-------------------------------------------------------------------------|-------------------------------------------------------------------------------|-------|--------|---------|---------|
| <b>Cohort 1a-14d-2m</b> | 139                                        | 47: 25<br>55: 1<br>56: 113                                              | 0                                                                             | 54.4  | 56     | 56-56   | 47-56   |
| <b>Cohort 1b-14d-8m</b> | 141                                        | 249: 16<br>250: 103<br>251: 22                                          | 141 (9-11 days)                                                               | 250.0 | 250    | 250-250 | 249-251 |
| <b>Cohort 2a-28d-2m</b> | 130                                        | 38: 1<br>40: 22<br>49: 4<br>51: 103                                     | 0                                                                             | 49.0  | 52     | 51-51   | 38-51   |
| <b>Cohort 2b-28d-8m</b> | 130                                        | 235: 11<br>236: 24<br>237: 3<br>238: 92                                 | 0                                                                             | 237.4 | 238    | 236-238 | 235-238 |
| <b>Cohort 3-28d-8m</b>  | 303                                        | 240: 1<br>247: 1<br>248: 2<br>255: 123<br>256: 154<br>257: 21<br>258: 1 | 0                                                                             | 255.5 | 256    | 255-256 | 240-258 |

## Supplemental Flowcharts

### A. Cohort 1, adults aged 18-59 years old

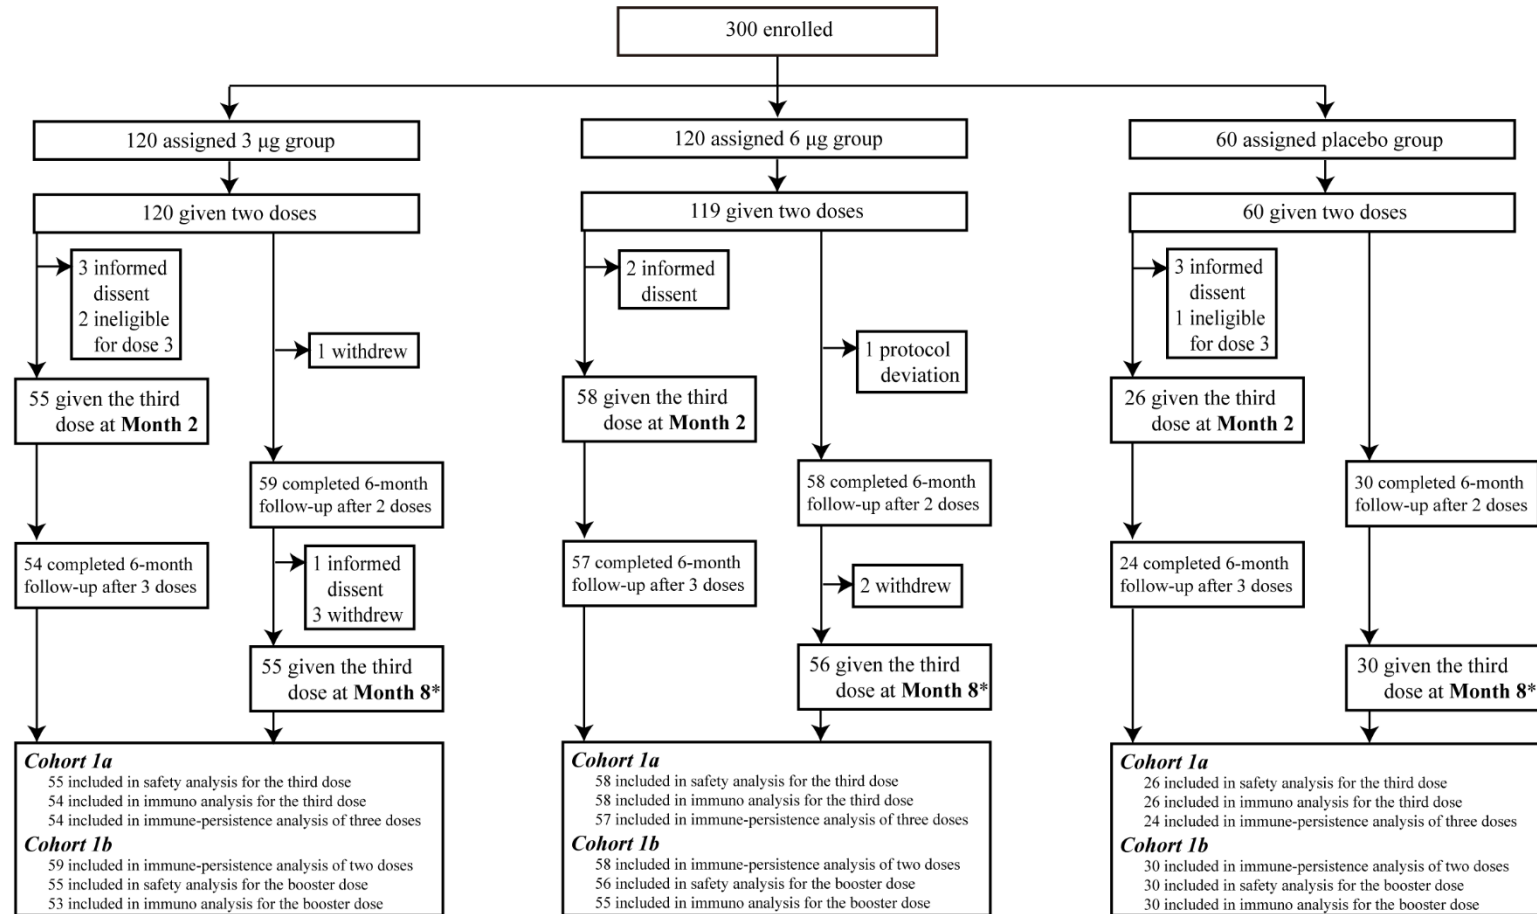

\*Participants received the third dose between day 249 and day 251, outside the time window specified in the protocol.

**B. Cohort 2, adults aged 18-59 years old**

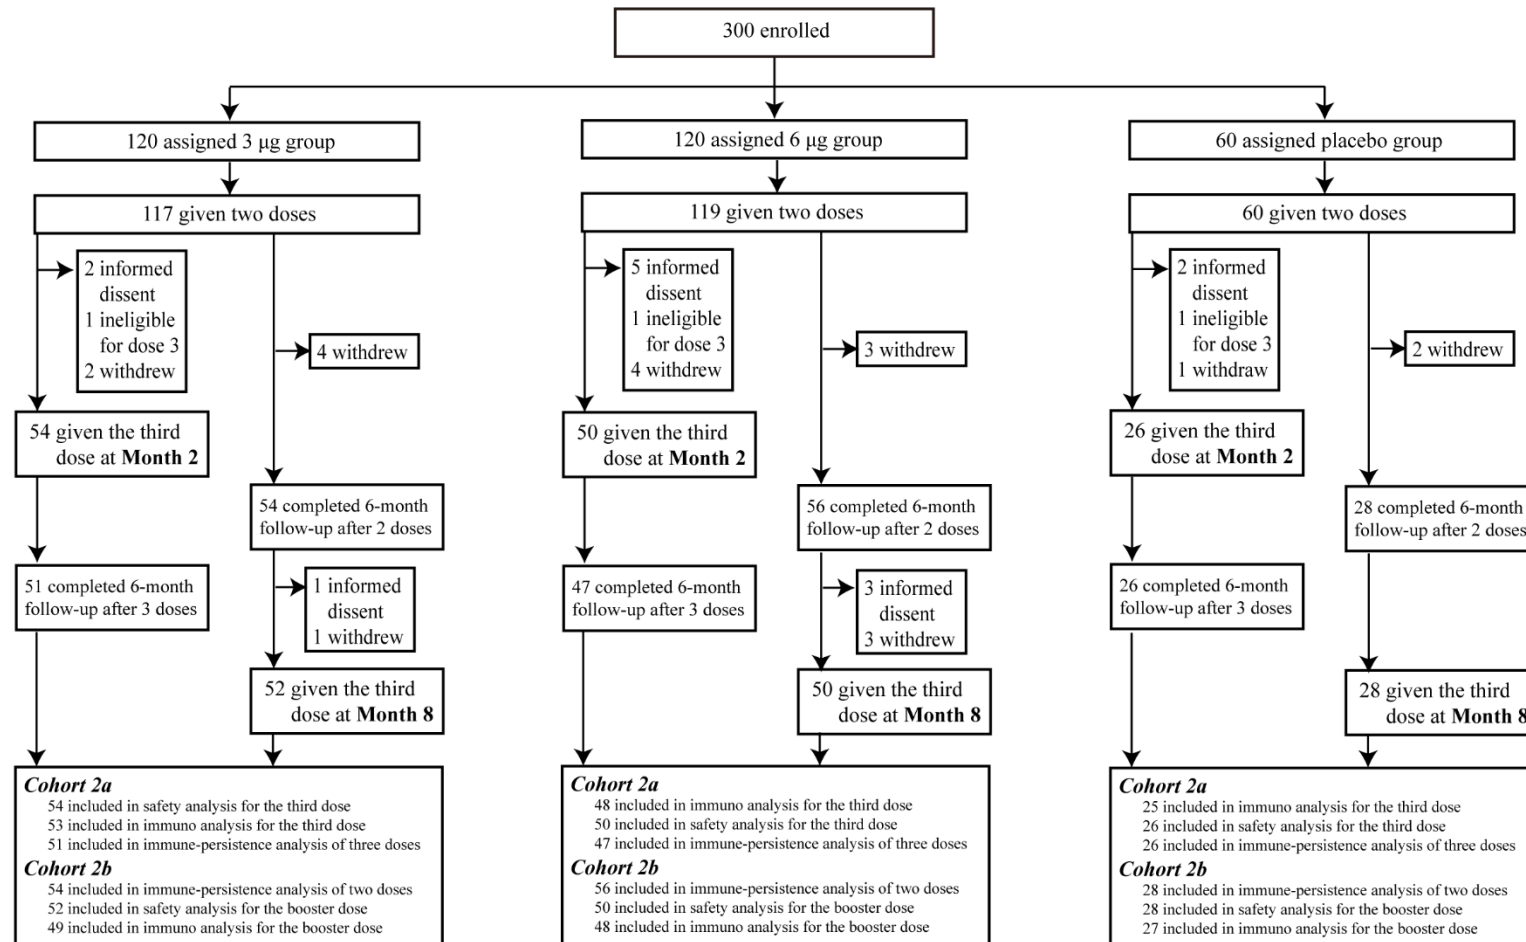

**C. Cohort 3, adults aged 60 years and older**

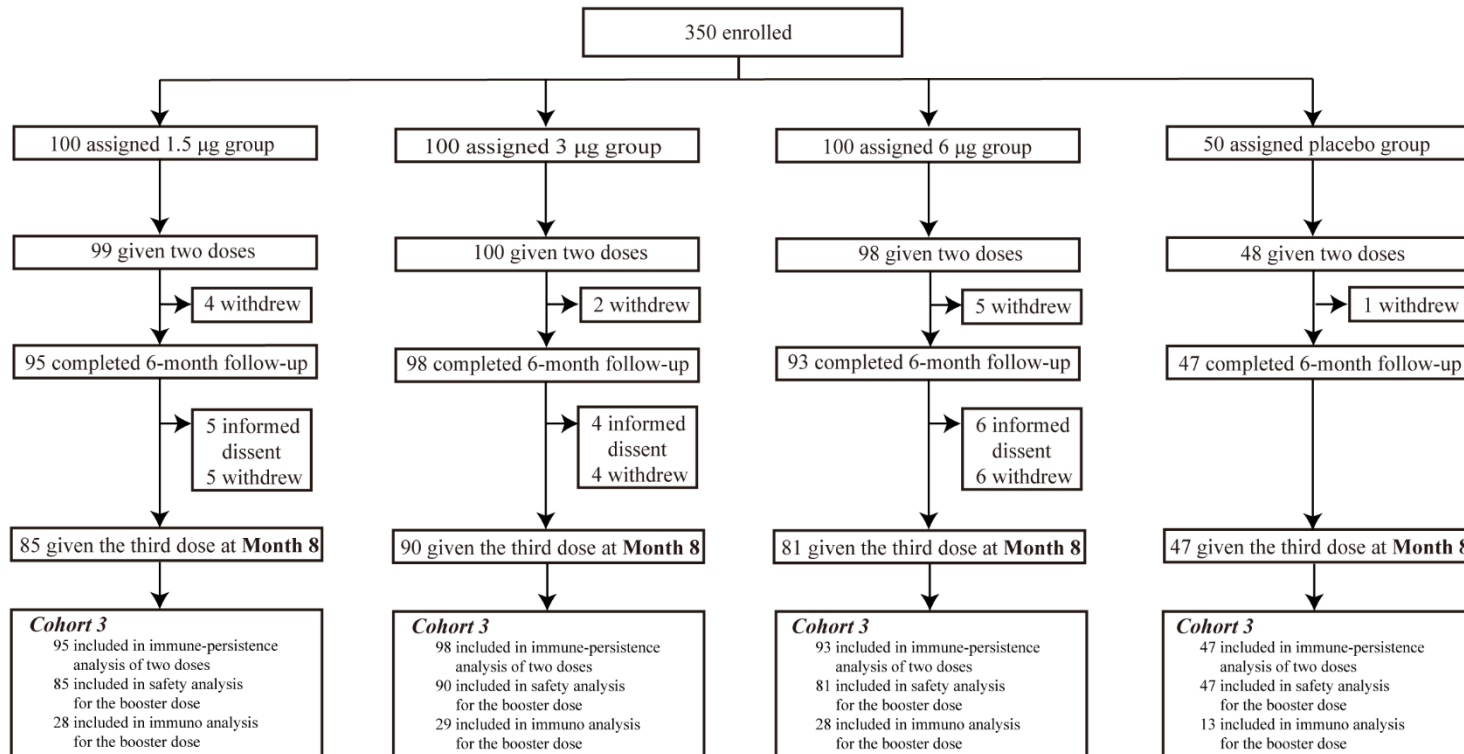



## Supplemental Results of Immunogenicity

**Table S1. Six-month immune persistence after primary three-dose regimen of CoronaVac in adults (immune-persistence analysis set)**

| Indicator                          |                                     | 3 µg group                 | 6 µg group                 | placebo group           | P value* | P value† |
|------------------------------------|-------------------------------------|----------------------------|----------------------------|-------------------------|----------|----------|
| <b>Cohort 1a-14d-2m</b>            |                                     |                            |                            |                         |          |          |
| <b>Baseline (Pre-immunization)</b> |                                     |                            |                            |                         |          |          |
|                                    | Seropositivity<br>[n/N, %, (95%CI)] | 0/54, 0<br>(0.00-6.60)     | 0/57, 0<br>(0.00-6.27)     | 0/24, 0<br>(0.00-14.25) | 1.00     | —        |
|                                    | GMT (95%CI)                         | 2.0 (2.0-2.0)              | 2.0 (2.0-2.0)              | 2.0 (2.0-2.0)           | NA       | —        |
| <b>Day 28 after dose 2</b>         |                                     |                            |                            |                         |          |          |
|                                    | Seropositivity<br>[n/N, %, (95%CI)] | 50/54, 93<br>(82.11-97.94) | 56/57, 98<br>(90.61-99.96) | 0/24, 0<br>(0.00-14.25) | <0.01    | —        |
|                                    | GMT (95%CI)                         | 21.8 (17.3-27.6)           | 29.5 (23.8-36.6)           | 2.0 (2.0-2.0)           | <0.01    | —        |
| <b>Day 28 after dose 3</b>         |                                     |                            |                            |                         |          |          |
|                                    | Seropositivity<br>[n/N, %, (95%CI)] | 53/54, 98<br>(90.11-99.95) | 56/57, 98<br>(90.61-99.96) | 0/24, 0<br>(0.00-14.25) | <0.01    | 1.00     |
|                                    | GMT (95%CI)                         | 45.8 (35.7-58.9)           | 73.5 (58.3-92.7)           | 2.0 (2.0-2.0)           | <0.01    | <0.01    |
| <b>Month 6 after dose 3</b>        |                                     |                            |                            |                         |          |          |
|                                    | Seropositivity<br>[n/N, %, (95%CI)] | 33/54, 61<br>(46.88-74.08) | 39/57, 68<br>(54.76-80.09) | 0/24, 0<br>(0.00-14.25) | <0.01    | 0.42     |
|                                    | GMT (95%CI)                         | 9.2 (7.1-12.0)             | 13.6 (10.5-17.7)           | 2.1 (2.0-2.3)           | <0.01    | 0.04     |

| <b>Cohort 2a-28d-2m</b>            |                                     |                            |                             |                         |       |      |
|------------------------------------|-------------------------------------|----------------------------|-----------------------------|-------------------------|-------|------|
| <b>Baseline (Pre-immunization)</b> |                                     |                            |                             |                         |       |      |
|                                    | Seropositivity<br>[n/N, %, (95%CI)] | 0/51, 0<br>(0.00-6.98)     | 0/47, 0<br>(0.00-7.55)      | 0/26, 0<br>(0.00-13.23) | 1.00  | —    |
|                                    | GMT (95%CI)                         | 2.0 (2.0-2.0)              | 2.0 (2.0-2.0)               | 2.0 (2.0-2.0)           | NA    | —    |
| <b>Day 28 after dose 2</b>         |                                     |                            |                             |                         |       |      |
|                                    | Seropositivity<br>[n/N, %, (95%CI)] | 48/51, 94<br>(83.76-98.77) | 47/47,100<br>(93.80-100.00) | 0/26, 0<br>(0.00-13.23) | <0.01 | —    |
|                                    | GMT (95%CI)                         | 37.1 (27.4-50.2)           | 56.5 (43.6-73.2)            | 2.0 (2.0-2.0)           | <0.01 | —    |
| <b>Day 28 after dose 3</b>         |                                     |                            |                             |                         |       |      |
|                                    | Seropositivity<br>[n/N, %, (95%CI)] | 50/51, 98<br>(89.55-99.95) | 47/47,100<br>(93.80-100.00) | 0/26, 0<br>(0.00-13.23) | <0.01 | 1.00 |
|                                    | GMT (95%CI)                         | 48.8 (38.9-61.3)           | 51.0 (40.5-64.2)            | 2.0 (2.0-2.0)           | <0.01 | 0.78 |
| <b>Month 6 after dose 3</b>        |                                     |                            |                             |                         |       |      |
|                                    | Seropositivity<br>[n/N, %, (95%CI)] | 34/51, 67<br>(52.08-79.24) | 24/47, 51<br>(36.06-65.92)  | 0/26, 0<br>(0.00-13.23) | <0.01 | 0.12 |
|                                    | GMT (95%CI)                         | 10.0 (7.3-13.7)            | 10.2 (7.1-14.6)             | 2.0 (2.0-2.0)           | <0.01 | 0.95 |

GMT (geometric mean titer) was calculated based on log-transformation data. Seropositivity threshold was set as a titer of 8.

ANOVA model with log-transformation (GMT) was used to detect the difference among groups. Pairwise comparison between groups was conducted by group t-test with log-transformation. P value was calculated by Fisher exact probability method and of the comparison of seropositivity rate. Bonferroni correction was performed as a post hoc test.

p\* values are for comparisons among all groups. p† values are for comparisons between 3 µg group and 6 µg group.

**Table S2. Six-month immune persistence after two doses of CoronaVac in adults (immune-persistence analysis set)**

|                             | Indicator                           | 3 µg group                 | 6 µg group                   | placebo                 | P value* | P value† |
|-----------------------------|-------------------------------------|----------------------------|------------------------------|-------------------------|----------|----------|
| <b>Cohort 1b_14d/8m</b>     |                                     |                            |                              |                         |          |          |
| Baseline (Pre-immunization) |                                     |                            |                              |                         |          |          |
|                             | Seropositivity<br>[n/N, %, (95%CI)] | 0/59, 0<br>(0.00-6.06)     | 0/58, 0<br>(0.00-6.16)       | 0/30, 0<br>(0.00-11.57) | 1.00     | —        |
|                             | GMT (95%CI)                         | 2.0 (2.0-2.0)              | 2.0 (2.0-2.0)                | 2.0 (2.0-2.0)           | NA       | —        |
| Day 28 after dose 2         |                                     |                            |                              |                         |          |          |
|                             | Seropositivity<br>[n/N, %, (95%CI)] | 56/59, 95<br>(85.85-98.94) | 58/58, 100<br>(93.80-100.00) | 0/30, 0<br>(0.00-11.57) | <0.01    | —        |
|                             | GMT (95%CI)                         | 26.2 (21.3-32.3)           | 30.7 (25.0-37.7)             | 2.0 (2.0-2.0)           | <0.01    | —        |
| Month 6 after dose 2        |                                     |                            |                              |                         |          |          |
|                             | Seropositivity<br>[n/N, %, (95%CI)] | 10/59, 17<br>(8.44-28.97)  | 14/58, 24<br>(13.87-37.17)   | 0/30, 0<br>(0.00-11.57) | <0.01    | 0.34     |
|                             | GMT (95%CI)                         | 4.1 (3.3-5.2)              | 4.8 (3.8-6.1)                | 2.0 (2.0-2.0)           | <0.01    | 0.36     |
| <b>Cohort 2b_28d/8m</b>     |                                     |                            |                              |                         |          |          |
| Baseline (Pre-immunization) |                                     |                            |                              |                         |          |          |
|                             | Seropositivity<br>[n/N, %, (95%CI)] | 0/54, 0<br>(0.00-6.60)     | 0/56, 0<br>(0.00-6.38)       | 0/28, 0<br>(0.00-12.34) | 1.00     | —        |

|                      |                                     |                              |                              |                         |       |      |
|----------------------|-------------------------------------|------------------------------|------------------------------|-------------------------|-------|------|
|                      | GMT (95%CI)                         | 2.0 (2.0-2.0)                | 2.0 (2.0-2.0)                | 2.0 (2.0-2.0)           | 1.00  | —    |
| Day 28 after dose 2  |                                     |                              |                              |                         |       |      |
|                      | Seropositivity<br>[n/N, %, (95%CI)] | 54/54, 100<br>(93.40-100.00) | 56/56, 100<br>(93.62-100.00) | 0/28, 0<br>(0.00-12.34) | <0.01 | —    |
|                      | GMT (95%CI)                         | 48.4 (39.0-60.1)             | 71.7 (58.4-87.9)             | 2.1 (1.9-2.3)           | <0.01 | —    |
| Month 6 after dose 2 |                                     |                              |                              |                         |       |      |
|                      | Seropositivity<br>[n/N, %, (95%CI)] | 19/54, 35<br>(22.68-49.38)   | 26/56, 46<br>(32.99-60.26)   | 0/28, 0<br>(0.00-12.34) | <0.01 | 0.23 |
|                      | GMT (95%CI)                         | 6.7 (5.2-8.6)                | 7.1 (5.6-8.9)                | 2.0 (2.0-2.0)           | <0.01 | 0.76 |

GMT (geometric mean titer) was calculated based on log-transformation data. Seropositivity threshold was set as a titer of 8.

ANOVA model with log-transformation (GMT) was used to detect the difference among groups. Pairwise comparison between groups was conducted by group t-test with log-transformation. P value was calculated by Fisher exact probability method and of the comparison of seropositivity rate. Bonferroni correction was performed as a post hoc test.

p\* values are for comparisons among all groups. p† values are for comparisons between 3 µg group and 6 µg group.

**Table S3. Six-month immune persistence after two doses of CoronaVac in older adults (immune-persistence analysis set)**

| Indicator                        | 1.5 µg group            | 3 µg group              | 6 µg group                 | placebo              | P value           |                            |                            |                          |
|----------------------------------|-------------------------|-------------------------|----------------------------|----------------------|-------------------|----------------------------|----------------------------|--------------------------|
|                                  |                         |                         |                            |                      | Among four groups | 1.5 µg group vs 3 µg group | 1.5 µg group vs 6 µg group | 3 µg group vs 6 µg group |
| Baseline (Pre-immunization)      |                         |                         |                            |                      |                   |                            |                            |                          |
| Seropositivity [n/N, %, (95%CI)] | 0/95, 0 (0.00-3.81)     | 0/98, 0 (0.00-3.89)     | 1/93, 1 (0.03-5.85)        | 0/47, 0 (0.00-7.55)  | 0.42              | —                          | —                          | —                        |
| GMT (95%CI)                      | 2.0 (2.0-2.0)           | 2.0 (2.0-2.1)           | 2.1 (1.9-2.2)              | 2.0 (2.0-2.0)        | 0.60              | —                          | —                          | —                        |
| Day 28 after dose 2              |                         |                         |                            |                      |                   |                            |                            |                          |
| Seropositivity [n/N, %, (95%CI)] | 86/95, 91 (82.78-95.58) | 95/98, 97 (91.31-99.36) | 93/93, 100 (96.11, 100.00) | 0/47, 0 (0.00-7.55)  | <0.01             | —                          | —                          | —                        |
| GMT (95%CI)                      | 23.0 (19.0-27.8)        | 40.8 (33.8-49.3)        | 50.5 (42.7-59.8)           | 2.1 (2.0-2.1)        | <0.01             | —                          | —                          | —                        |
| Month 6 after dose 2             |                         |                         |                            |                      |                   |                            |                            |                          |
| Seropositivity [n/N, %, (95%CI)] | 12/95, 13 (6.70, 21.03) | 17/98, 17 (10.44-26.31) | 21/93, 23 (14.55-32.42)    | 1/47, 2 (0.05-11.29) | 0.01              | 0.36                       | 0.07                       | 0.37                     |
| GMT (95%CI)                      | 3.1 (2.7-3.6)           | 3.4 (2.9-4.1)           | 4.1 (3.3-5.0)              | 2.1 (1.9-2.2)        | <0.01             | 0.41                       | 0.04                       | 0.22                     |

GMT (geometric mean titer) was calculated based on log-transformation data. Seropositivity threshold was set as a titer of 8.

ANOVA model with log-transformation (GMT) was used to detect the difference among groups. Pairwise comparison between groups was conducted by group t-test with log-transformation. P value was calculated by Fisher exact probability method and of the comparison of seropositivity rate. Bonferroni correction was performed as a post hoc test.

**Table S4. Comparison of neutralising antibody levels induced by dose 3 among the four groups in adults aged 18-59 years old (cohorts 1 and 2)**

| Variable               | Coefficient     | Statistics | P-value |
|------------------------|-----------------|------------|---------|
| Intercept              | 5.45            | 19.49      | <0.001  |
| Age                    | -0.03           | -5.07      | <0.001  |
| Sex                    |                 |            |         |
| Male                   | Reference group |            |         |
| Female                 | 0.12            | 1.22       | 0.22    |
| Dose group             |                 |            |         |
| 3 µg                   | Reference group |            |         |
| 6 µg                   | 0.49            | 2.61       | 0.009   |
| Schedule group         |                 |            |         |
| Cohort 1a-14d-2m       | Reference group |            |         |
| Cohort 1b-14d-8m       | 0.70            | 3.63       | <0.001  |
| Cohort 2a-28d-2m       | 0.43            | 2.24       | 0.04    |
| Cohort 2b-28d-8m       | 1.33            | 6.92       | <0.001  |
| Sampling date          |                 |            |         |
| Day 28 after dose 2    | Reference group |            |         |
| Day 28 after dose 3    | 1.34            | 17.07      | <0.001  |
| Cross reaction         |                 |            |         |
| 6 µg: Cohort 1b-14d-8m | -0.11           | -0.40      | 0.69    |
| 6 µg: Cohort 2a-28d-2m | -0.16           | -0.59      | 0.55    |
| 6 µg: Cohort 2b-28d-8m | 0.06            | 0.23       | 0.82    |

## Supplemental Results of safety

**Table S5. Adverse reactions reported within 28 days post each dose for Cohort 1a-14d-2m**

| Adverse Reactions<br>(System organ class,<br>preferred term) | Dose 1†                 |                         |                   |                  |          | Dose 2                  |                         |                   |                  |          | Dose 3                  |                         |                   |                  |          |
|--------------------------------------------------------------|-------------------------|-------------------------|-------------------|------------------|----------|-------------------------|-------------------------|-------------------|------------------|----------|-------------------------|-------------------------|-------------------|------------------|----------|
|                                                              | 3 µg<br>group<br>(N=60) | 6 µg<br>group<br>(N=60) | Placebo<br>(N=30) | Total<br>(N=150) | P value* | 3 µg<br>group<br>(N=60) | 6 µg<br>group<br>(N=60) | Placebo<br>(N=30) | Total<br>(N=150) | P value* | 3 µg<br>group<br>(N=55) | 6 µg<br>group<br>(N=58) | Placebo<br>(N=26) | Total<br>(N=139) | P value* |
| <b>Total</b>                                                 | 11(18%)                 | 11(18%)                 | 5(17%)            | 27(18%)          | 1.00     | 9(15%)                  | 10(17%)                 | 1(3%)             | 20(13%)          | 0.20     | 5(9%)                   | 6(10%)                  | -                 | 11(7%)           | 0.25     |
| Grade 1                                                      | 11(18%)                 | 11(18%)                 | 5(17%)            | 27(18%)          | 1.00     | 9(15%)                  | 10(17%)                 | 1(3%)             | 20(13%)          | 0.20     | 5(9%)                   | 5(9%)                   | -                 | 10(7%)           | 0.35     |
| Grade 2                                                      | 1(2%)                   | -                       | -                 | 1(1%)            | 1.00     | 1(2%)                   | 1(2%)                   | -                 | 2(1%)            | 1.00     | 1(2%)                   | 1(2%)                   | -                 | 2(1%)            | 1.00     |
| General disorders and<br>administration site<br>conditions   | 7(12%)                  | 10(17%)                 | 4(13%)            | 21(14%)          | 0.75     | 9(15%)                  | 9(15%)                  | -                 | 18(12%)          | 0.05     | 3(5%)                   | 5(9%)                   | -                 | 8(6%)            | 0.40     |
| Injection-site pain                                          | 5(8%)                   | 8(13%)                  | 3(10%)            | 16(11%)          | 0.70     | 7(12%)                  | 8(13%)                  | -                 | 15(10%)          | 0.09     | 3(5%)                   | 5(9%)                   | -                 | 8(6%)            | 0.40     |
| Fatigue                                                      | 1(2%)                   | 1(2%)                   | 2(7%)             | 4(3%)            | 0.33     | 2(3%)                   | -                       | -                 | 2(1%)            | 0.36     | -                       | -                       | -                 | -                | -        |
| Fever                                                        | 1(2%)                   | 1(2%)                   | -                 | 2(1%)            | 1.00     | -                       | -                       | -                 | -                | -        | -                       | -                       | -                 | -                | -        |
| Injection-site swelling                                      | -                       | -                       | -                 | -                | -        | -                       | 2(3%)                   | -                 | 2(1%)            | 0.36     | -                       | -                       | -                 | -                | -        |
| Injection-site<br>hypoesthesia                               | 1(2%)                   | 1(2%)                   | -                 | 2(1%)            | 1.00     | -                       | -                       | -                 | -                | -        | -                       | -                       | -                 | -                | -        |
| Injection-site redness                                       | -                       | -                       | -                 | -                | -        | 1(2%)                   | 1(2%)                   | -                 | 2(1%)            | 1.00     | -                       | -                       | -                 | -                | -        |
| Injection-site<br>discoloration                              | -                       | -                       | -                 | -                | -        | 1(2%)                   | -                       | -                 | 1(1%)            | 1.00     | -                       | -                       | -                 | -                | -        |
| Injection-site itching                                       | -                       | -                       | -                 | -                | -        | 1(2%)                   | -                       | -                 | 1(1%)            | 1.00     | -                       | -                       | -                 | -                | -        |
| Injection-site<br>induration                                 | -                       | -                       | -                 | -                | -        | -                       | 1(2%)                   | -                 | 1(1%)            | 1.00     | -                       | -                       | -                 | -                | -        |
| Gastrointestinal<br>disorders                                | 3(5%)                   | -                       | -                 | 3(2%)            | 0.23     | -                       | -                       | 1(3%)             | 1(1%)            | 0.20     | 1(2%)                   | 1(2%)                   | -                 | 2(1%)            | 1.00     |
| Diarrhea                                                     | -                       | -                       | -                 | -                | -        | -                       | -                       | -                 | -                | -        | 1(2%)                   | -                       | -                 | 1(1%)            | 0.58     |
| Nausea                                                       | 1(2%)                   | -                       | -                 | 1(1%)            | 1.00     | -                       | -                       | -                 | -                | -        | 1(2%)                   | 1(2%)                   | -                 | 2(1%)            | 1.00     |
| Vomiting                                                     | 1(2%)                   | -                       | -                 | 1(1%)            | 1.00     | -                       | -                       | -                 | -                | -        | -                       | -                       | -                 | -                | -        |

| Adverse Reactions<br>(System organ class,<br>preferred term) | Dose 1†                 |                         |                   |                  |          | Dose 2                  |                         |                   |                  |          | Dose 3                  |                         |                   |                  |          |
|--------------------------------------------------------------|-------------------------|-------------------------|-------------------|------------------|----------|-------------------------|-------------------------|-------------------|------------------|----------|-------------------------|-------------------------|-------------------|------------------|----------|
|                                                              | 3 µg<br>group<br>(N=60) | 6 µg<br>group<br>(N=60) | Placebo<br>(N=30) | Total<br>(N=150) | P value* | 3 µg<br>group<br>(N=60) | 6 µg<br>group<br>(N=60) | Placebo<br>(N=30) | Total<br>(N=150) | P value* | 3 µg<br>group<br>(N=55) | 6 µg<br>group<br>(N=58) | Placebo<br>(N=26) | Total<br>(N=139) | P value* |
| Nervous system disorders                                     | 1(2%)                   | -                       | 1(3%)             | 2(1%)            | 0.68     | 1(2%)                   | 1(2%)                   | -                 | 2(1%)            | 1.00     | -                       | 1(2%)                   | -                 | 1(1%)            | 1.00     |
| Headache                                                     | -                       | -                       | 1(3%)             | 1(1%)            | 0.20     | 1(2%)                   | 1(2%)                   | -                 | 2(1%)            | 1.00     | -                       | 1(2%)                   | -                 | 1(1%)            | 1.00     |
| Dizziness                                                    | 1(2%)                   | -                       | -                 | 1(1%)            | 1.00     | -                       | -                       | -                 | -                | -        | -                       | -                       | -                 | -                | -        |
| Musculoskeletal and connective tissue disorders              | 2(3%)                   | -                       | -                 | 2(1%)            | 0.36     | -                       | -                       | -                 | -                | -        | 1(2%)                   | -                       | -                 | 1(1%)            | 0.58     |
| Muscle pain                                                  | 2(3%)                   | -                       | -                 | 2(1%)            | 0.36     | -                       | -                       | -                 | -                | -        | 1(2%)                   | -                       | -                 | 1(1%)            | 0.58     |
| Respiratory, thoracic and mediastinal disorders              | -                       | 1(2%)                   | -                 | 1(1%)            | 1.00     | -                       | -                       | -                 | -                | -        | -                       | 1(2%)                   | -                 | 1(1%)            | 1.00     |
| Cough                                                        | -                       | 1(2%)                   | -                 | 1(1%)            | 1.00     | -                       | -                       | -                 | -                | -        | -                       | 1(2%)                   | -                 | 1(1%)            | 1.00     |

†: Reported within 14 days post dose 1.

P value\* was calculated by Fisher exact probability method and of the comparison of incidence rate among three groups.



**Table S6. Adverse reactions reported within 28 days after the third dose for Cohort 1b-14d-8m**

| <b>Adverse Reactions<br/>(System organ class, preferred term)</b> | <b>3 µg group<br/>(N=55)</b> | <b>6 µg group<br/>(N=56)</b> | <b>Placebo<br/>(N=30)</b> | <b>Total<br/>(N=141)</b> | <b>P value *</b> |
|-------------------------------------------------------------------|------------------------------|------------------------------|---------------------------|--------------------------|------------------|
| Total                                                             | 10(18%)                      | 13(23%)                      | 3(10%)                    | 26(18%)                  | 0.33             |
| Grade 1                                                           | 10(18%)                      | 13(23%)                      | 3(10%)                    | 26(18%)                  | 0.33             |
| Grade 2                                                           | 1(2%)                        | 0(0%)                        | 1(3%)                     | 2(1%)                    | 0.52             |
| General disorders and administration site conditions              | 8(15%)                       | 11(20%)                      | 2(7%)                     | 21(15%)                  | 0.30             |
| Injection-site pain                                               | 8(1%)                        | 9(16%)                       | 0(0%)                     | 17(12%)                  | 0.05             |
| Injection-site itching                                            | 0(0%)                        | 1(2%)                        | 2(7%)                     | 3(2%)                    | 0.11             |
| Fever                                                             | 0(0%)                        | 1(2%)                        | 0(0%)                     | 1(1%)                    | 1.00             |
| Fatigue                                                           | 0(0%)                        | 1(2%)                        | 0(0%)                     | 1(1%)                    | 1.00             |
| Injection-site swelling                                           | 0(0%)                        | 0(0%)                        | 1(3%)                     | 1(1%)                    | 0.21             |
| Nervous system disorders                                          | 1(2%)                        | 2(4%)                        | 1(3%)                     | 4(3%)                    | 1.00             |
| Headache                                                          | 1(2%)                        | 2(4%)                        | 1(3%)                     | 4(3%)                    | 1.00             |
| Dizziness                                                         | 0(0%)                        | 1(2%)                        | 0(0%)                     | 1(1%)                    | 1.00             |
| Respiratory, thoracic and mediastinal disorders                   | 1(2%)                        | 2(4%)                        | 0(0%)                     | 3(2%)                    | 0.80             |
| Cough                                                             | 0(0%)                        | 2(4%)                        | 0(0%)                     | 2(1%)                    | 0.35             |
| Laryngeal stimulation                                             | 1(2%)                        | 0(0%)                        | 0(0%)                     | 1(1%)                    | 0.60             |
| Oropharyngeal pain                                                | 0(0%)                        | 1(2%)                        | 0(0%)                     | 1(1%)                    | 1.00             |
| Musculoskeletal and connective tissue disorders                   | 0(0%)                        | 1(2%)                        | 0(0%)                     | 1(1%)                    | 1.00             |
| Muscle pain                                                       | 0(0%)                        | 1(2%)                        | 0(0%)                     | 1(1%)                    | 1.00             |
| Gastrointestinal disorders                                        | 1(2%)                        | 0(0%)                        | 0(0%)                     | 1(1%)                    | 0.60             |
| Nausea                                                            | 1(2%)                        | 0(0%)                        | 0(0%)                     | 1(1%)                    | 0.60             |
| Eye disorders                                                     | 0(0%)                        | 1(2%)                        | 0(0%)                     | 1(1%)                    | 1.00             |
| Periorbital oedema                                                | 0(0%)                        | 1(2%)                        | 0(0%)                     | 1(1%)                    | 1.00             |

\*P value was calculated by Fisher exact probability method and of the comparison of incidence rate among three groups.

**Table S7. Adverse reactions reported within 28 days post each dose for Cohort 2a-28d-2m**

| Adverse Reactions<br>(System organ<br>class, preferred<br>term) | Dose 1                  |                         |                   |                  |          | Dose 2                  |                         |                   |                  |          | Dose 3                  |                         |                   |                  |          |
|-----------------------------------------------------------------|-------------------------|-------------------------|-------------------|------------------|----------|-------------------------|-------------------------|-------------------|------------------|----------|-------------------------|-------------------------|-------------------|------------------|----------|
|                                                                 | 3 µg<br>group<br>(N=60) | 6 µg<br>group<br>(N=60) | Placebo<br>(N=30) | Total<br>(N=150) | P value* | 3 µg<br>group<br>(N=59) | 6 µg<br>group<br>(N=60) | Placebo<br>(N=30) | Total<br>(N=149) | P value* | 3 µg<br>group<br>(N=54) | 6 µg<br>group<br>(N=50) | Placebo<br>(N=26) | Total<br>(N=130) | P value* |
| <b>Total</b>                                                    | 11(18%)                 | 10(17%)                 | 7(23%)            | 28(19%)          | 0.74     | 3(5%)                   | 6(10%)                  | 2(7%)             | 11(7%)           | 0.67     | 3(6%)                   | 1(2%)                   | -                 | 4(3%)            | 0.53     |
| Grade 1                                                         | 11(18%)                 | 9(15%)                  | 7(23%)            | 27(18%)          | 0.58     | 3(5%)                   | 6(10%)                  | 2(7%)             | 11(7%)           | 0.67     | 3(6%)                   | 1(2%)                   | -                 | 4(3%)            | 0.53     |
| Grade 2                                                         | -                       | 2(3%)                   | -                 | 2(1%)            | 0.36     | -                       | -                       | -                 | -                | -        | -                       | -                       | -                 | -                | -        |
| General disorders<br>and administration<br>site conditions      | 8(13%)                  | 10(17%)                 | 5(17%)            | 23(15%)          | 0.87     | 2(3%)                   | 6(10%)                  | 2(7%)             | 10(7%)           | 0.40     | 2(4%)                   | 1(2%)                   | -                 | 3(2%)            | 1.00     |
| Injection-site pain                                             | 7(12%)                  | 6(10%)                  | 3(10%)            | 16(11%)          | 1.00     | 2(3%)                   | 4(7%)                   | 2(7%)             | 8(5%)            | 0.71     | 1(2%)                   | 1(2%)                   | -                 | 2(2%)            | 1.00     |
| Fatigue                                                         | 1(2%)                   | 2(3%)                   | 1(3%)             | 4(3%)            | 1.00     | -                       | 1(2%)                   | -                 | 1(1%)            | 1.00     | 1(2%)                   | -                       | -                 | 1(1%)            | 1.00     |
| Fever                                                           | -                       | 3(5%)                   | -                 | 3(2%)            | 0.23     | -                       | 2(3%)                   | -                 | 2(1%)            | 0.52     | -                       | -                       | -                 | -                | -        |
| Injection-site<br>discoloration                                 | -                       | -                       | 1(3%)             | 1(1%)            | 0.20     | -                       | -                       | -                 | -                | -        | -                       | -                       | -                 | -                | -        |
| Injection-site<br>swelling                                      | -                       | -                       | -                 | -                | -        | -                       | -                       | 1(3%)             | 1(1%)            | 0.20     | -                       | -                       | -                 | -                | -        |
| Injection-site<br>redness                                       | -                       | 1(2%)                   | -                 | 1(1%)            | 1.00     | -                       | -                       | -                 | -                | -        | -                       | -                       | -                 | -                | -        |
| Musculoskeletal<br>and connective<br>tissue disorders           | 2(3%)                   | 1(2%)                   | 1(3%)             | 4(3%)            | 1.00     | -                       | -                       | -                 | -                | -        | -                       | -                       | -                 | -                | -        |
| Muscle pain                                                     | 2(3%)                   | 1(2%)                   | 1(3%)             | 4(3%)            | 1.00     | -                       | -                       | -                 | -                | -        | -                       | -                       | -                 | -                | -        |
| Gastrointestinal<br>disorders                                   | 1(2%)                   | -                       | 1(3%)             | 2(1%)            | 0.68     | 1(2%)                   | 1(2%)                   | -                 | 2(1%)            | 1.00     | 1(2%)                   | -                       | -                 | 1(1%)            | 1.00     |
| Diarrhea                                                        | 1(2%)                   | -                       | -                 | 1(1%)            | 1.00     | 1(2%)                   | -                       | -                 | 1(1%)            | 0.60     | 1(2%)                   | -                       | -                 | 1(1%)            | 1.00     |
| Nausea                                                          | -                       | -                       | -                 | -                | -        | -                       | -                       | -                 | -                | -        | 1(2%)                   | -                       | -                 | 1(1%)            | 1.00     |
| Vomiting                                                        | -                       | -                       | 1(3%)             | 1(1%)            | 0.20     | -                       | 1(2%)                   | 0(0%)             | 1(1%)            | 1.00     | -                       | -                       | -                 | -                | -        |
| Metabolism and<br>nutrition disorders                           | -                       | 1(2%)                   | -                 | 1(1%)            | 1.00     | -                       | -                       | -                 | -                | -        | -                       | -                       | -                 | -                | -        |

| Adverse Reactions<br>(System organ<br>class, preferred<br>term) | Dose 1                  |                         |                   |                  |          | Dose 2                  |                         |                   |                  |          | Dose 3                  |                         |                   |                  |          |
|-----------------------------------------------------------------|-------------------------|-------------------------|-------------------|------------------|----------|-------------------------|-------------------------|-------------------|------------------|----------|-------------------------|-------------------------|-------------------|------------------|----------|
|                                                                 | 3 µg<br>group<br>(N=60) | 6 µg<br>group<br>(N=60) | Placebo<br>(N=30) | Total<br>(N=150) | P value* | 3 µg<br>group<br>(N=59) | 6 µg<br>group<br>(N=60) | Placebo<br>(N=30) | Total<br>(N=149) | P value* | 3 µg<br>group<br>(N=54) | 6 µg<br>group<br>(N=50) | Placebo<br>(N=26) | Total<br>(N=130) | P value* |
| Decreased<br>appetite                                           | -                       | 1(2%)                   | -                 | 1(1%)            | 1.00     | -                       | -                       | -                 | -                | -        | -                       | -                       | -                 | -                | -        |
| Respiratory,<br>thoracic and<br>mediastinal<br>disorders        | -                       | -                       | -                 | -                | -        | -                       | -                       | -                 | -                | -        | 2(4%)                   | -                       | -                 | 2(2%)            | 0.68     |
| Cough                                                           | -                       | -                       | -                 | -                | -        | -                       | -                       | -                 | -                | -        | 2(4%)                   | -                       | -                 | 2(2%)            | 0.68     |
| Nervous system<br>disorders                                     | -                       | 1(2%)                   | -                 | 1(1%)            | 1.00     | -                       | -                       | -                 | -                | -        | -                       | -                       | -                 | -                | -        |
| Headache                                                        | -                       | 1(2%)                   | -                 | 1(1%)            | 1.00     | -                       | -                       | -                 | -                | -        | -                       | -                       | -                 | -                | -        |
| Immune system<br>disorders                                      | 1(2%)                   | -                       | -                 | 1(1%)            | 1.00     | -                       | -                       | -                 | -                | -        | -                       | -                       | -                 | -                | -        |
| Hypersensitivity                                                | 1(2%)                   | -                       | -                 | 1(1%)            | 1.00     | -                       | -                       | -                 | -                | -        | -                       | -                       | -                 | -                | -        |

P value\* was calculated by Fisher exact probability method and of the comparison of incidence rate among three groups.

**Table S8. Adverse reactions reported within 28 days after the third dose for Cohort 2b-28d-8m**

| <b>Adverse Reactions<br/>(System organ class, preferred term)</b> | <b>3 µg<br/>group<br/>(N=52)</b> | <b>6 µg<br/>group<br/>(N=50)</b> | <b>Placebo<br/>group<br/>(N=28)</b> | <b>Total<br/>(N=130)</b> | <b>P value*</b> |
|-------------------------------------------------------------------|----------------------------------|----------------------------------|-------------------------------------|--------------------------|-----------------|
| <b>Any adverse reaction</b>                                       |                                  |                                  |                                     |                          |                 |
| Grade 1                                                           | 7(13%)                           | 10(20%)                          | 1(4%)                               | 18(14%)                  | 0.13            |
| Grade 2                                                           | 1(2%)                            | 1(2%)                            | 1(4%)                               | 3(2%)                    | 1               |
| <b>Systemic diseases and injection site adverse reactions</b>     |                                  |                                  |                                     |                          |                 |
| <b>Injection site pain</b>                                        |                                  |                                  |                                     |                          |                 |
| Grade 1                                                           | 6(12%)                           | 7(14%)                           | 0(0%)                               | 13(10%)                  | 0.11            |
| <b>Injection site swelling</b>                                    |                                  |                                  |                                     |                          |                 |
| Grade 1                                                           | 1(2%)                            | 0(0%)                            | 0(0%)                               | 1(1%)                    | 1               |
| <b>Injection site itch</b>                                        |                                  |                                  |                                     |                          |                 |
| Grade 1                                                           | 1(2%)                            | 0(0%)                            | 0(0%)                               | 1(1%)                    | 1               |
| <b>Fever</b>                                                      |                                  |                                  |                                     |                          |                 |
| Grade 1                                                           | 0(0%)                            | 1(2%)                            | 0(0%)                               | 1(1%)                    | 0.6             |
| Grade 2                                                           | 1(2%)                            | 0(0%)                            | 1(4%)                               | 2(2%)                    | 0.69            |
| <b>Fatigue</b>                                                    |                                  |                                  |                                     |                          |                 |
| Grade 1                                                           | 1(2%)                            | 2(4%)                            | 0(0%)                               | 3(2%)                    | 0.61            |
| <b>Respiratory, thoracic and mediastinal disorders</b>            |                                  |                                  |                                     |                          |                 |
| <b>Runny nose</b>                                                 |                                  |                                  |                                     |                          |                 |
| Grade 1                                                           | 0(0%)                            | 1(2%)                            | 0(0%)                               | 1(1%)                    | 0.6             |
| <b>Oropharyngeal pain</b>                                         |                                  |                                  |                                     |                          |                 |
| Grade 2                                                           | 1(2%)                            | 0(0%)                            | 0(0%)                               | 1(1%)                    | 1               |
| <b>Nervous system disorders</b>                                   |                                  |                                  |                                     |                          |                 |
| <b>Dizziness</b>                                                  |                                  |                                  |                                     |                          |                 |
| Grade 1                                                           | —                                | —                                | —                                   | —                        | —               |
| <b>Headache</b>                                                   |                                  |                                  |                                     |                          |                 |
| Grade 1                                                           | 1(2%)                            | 1(2%)                            | 1(4%)                               | 3(2%)                    | 1               |
| <b>Gastrointestinal disorders</b>                                 |                                  |                                  |                                     |                          |                 |
| <b>Diarrhea</b>                                                   |                                  |                                  |                                     |                          |                 |
| Grade 1                                                           | 1(2%)                            | 0(0%)                            | 0(0%)                               | 1(1%)                    | 1               |
| <b>Nausea</b>                                                     |                                  |                                  |                                     |                          |                 |
| Grade 1                                                           | 0(0%)                            | 2(4%)                            | 0(0%)                               | 2(2%)                    | 0.19            |
| <b>Musculoskeletal and connective tissue disorders</b>            |                                  |                                  |                                     |                          |                 |
| <b>Myalgia</b>                                                    |                                  |                                  |                                     |                          |                 |
| Grade 2                                                           | 0(0%)                            | 1(2%)                            | 0(0%)                               | 1(1%)                    | 0.6             |

\*P value was calculated by Fisher exact probability method and of the comparison of incidence rate among three groups.

**Table S9. Adverse reactions reported within 28 days after the third dose for Cohort 3-28d-8m**

| Adverse Reactions<br><br>(System organ class, preferred term) | 1.5 µg group (N=85) | 3 µg group (N=90) | 6 µg group (N=81) | Placebo group (N=47) | Total (N=303) | P value* |
|---------------------------------------------------------------|---------------------|-------------------|-------------------|----------------------|---------------|----------|
| <b>Any adverse reaction</b>                                   |                     |                   |                   |                      |               |          |
| Grade 1                                                       | 3(4%)               | 3(3%)             | 3(4%)             | 2(4%)                | 11(4%)        | 1        |
| Grade 2                                                       | 1(1%)               | 2(2%)             | 2(2%)             | 1(2%)                | 6(2%)         | 0.95     |
| <b>Systemic diseases and injection site adverse reactions</b> |                     |                   |                   |                      |               |          |
| <b>Injection site pain</b>                                    |                     |                   |                   |                      |               |          |
| Grade 1                                                       | 1(1%)               | 2(2%)             | 2(2%)             | 1(2%)                | 6(2%)         | 0.95     |
| <b>Injection site erythema</b>                                |                     |                   |                   |                      |               |          |
| Grade 2                                                       | 0(0%)               | 1(1%)             | 0(0%)             | 0(0%)                | 1(0%)         | 1        |
| <b>Fatigue</b>                                                |                     |                   |                   |                      |               |          |
| Grade 2                                                       | 0(0%)               | 1(1%)             | 0(0%)             | 1(2%)                | 2(1%)         | 0.52     |
| <b>Respiratory, thoracic and mediastinal disorders</b>        |                     |                   |                   |                      |               |          |
| <b>Cough</b>                                                  |                     |                   |                   |                      |               |          |
| Grade 1                                                       | 1(1%)               | 0(0%)             | 0(0%)             | 1(2%)                | 2(1%)         | 0.34     |
| Grade 2                                                       | 0(0%)               | 0(0%)             | 1(1%)             | 0(0%)                | 1(0%)         | 0.42     |
| <b>Runny nose</b>                                             |                     |                   |                   |                      |               |          |
| Grade 1                                                       | 0(0%)               | 0(0%)             | 1(1%)             | 0(0%)                | 1(0%)         | 0.42     |
| <b>Nervous system disorders</b>                               |                     |                   |                   |                      |               |          |
| <b>Dizziness</b>                                              |                     |                   |                   |                      |               |          |
| Grade 1                                                       | 1(1%)               | 1(1%)             | 0(0%)             | 0(0%)                | 2(1%)         | 1        |
| <b>Headache</b>                                               |                     |                   |                   |                      |               |          |
| Grade 1                                                       | 0(0%)               | 0(0%)             | 1(1%)             | 0(0%)                | 1(0%)         | 0.42     |
| <b>Gastrointestinal disorders</b>                             |                     |                   |                   |                      |               |          |
| <b>Nausea</b>                                                 |                     |                   |                   |                      |               |          |
| Grade 1                                                       | 1(1%)               | 1(1%)             | 0(0%)             | 0(0%)                | 2(1%)         | 1        |
| <b>Musculoskeletal and connective tissue disorders</b>        |                     |                   |                   |                      |               |          |
| <b>Myalgia</b>                                                |                     |                   |                   |                      |               |          |
| Grade 2                                                       | 1(1%)               | 0(0%)             | 0(0%)             | 0(0%)                | 1(0%)         | 0.7      |
| <b>Skin and subcutaneous tissue disorders</b>                 |                     |                   |                   |                      |               |          |
| <b>Rash</b>                                                   |                     |                   |                   |                      |               |          |
| Grade 2                                                       | 0(0%)               | 0(0%)             | 1(1%)             | 0(0%)                | 1(0%)         | 0.42     |

\*P value was calculated by Fisher exact probability method and of the comparison of incidence rate among three groups.

**Table S10. Serious adverse events reported in adults aged 18-59 years old**

| <b>Adverse events (MedDRA 23.0)</b>                                        | <b>3 µg group</b> | <b>6 µg group</b> | <b>Placebo</b> | <b>Total</b> | <b>P value*</b> |
|----------------------------------------------------------------------------|-------------------|-------------------|----------------|--------------|-----------------|
| <b>Cohort 1a-14d-2m</b>                                                    |                   |                   |                |              |                 |
| <b>No of participants</b>                                                  | <b>60</b>         | <b>60</b>         | <b>30</b>      | <b>150</b>   | <b>—</b>        |
| <b>Total</b>                                                               | <b>1(2%)</b>      | <b>2(3%)</b>      | <b>0(0%)</b>   | <b>3(2%)</b> | <b>0.80</b>     |
| <b>Hepatobiliary disorders</b>                                             |                   |                   |                |              |                 |
| Autoimmune hepatitis                                                       | 1(2%)             | 0(0%)             | 0(0%)          | 1(1%)        | 1.00            |
| <b>Injury, poisoning and procedural complications</b>                      |                   |                   |                |              |                 |
| Ankle fractures                                                            | 0(0%)             | 1(2%)             | 0(0%)          | 1(1%)        | 1.00            |
| <b>Neoplasms benign, malignant and unspecified (incl cysts and polyps)</b> |                   |                   |                |              |                 |
| Teratoma                                                                   | 0(0%)             | 1(2%)             | 0(0%)          | 1(1%)        | 1.00            |
| Uterine leiomyoma                                                          | 0(0%)             | 1(2%)             | 0(0%)          | 1(1%)        | 1.00            |
| <b>Reproductive system and breast disorders</b>                            |                   |                   |                |              |                 |
| Pelvic adhesions                                                           | 0(0%)             | 1(2%)             | 0(0%)          | 1(1%)        | 1.00            |
| <b>Gastrointestinal disorders</b>                                          |                   |                   |                |              |                 |
| Erosive gastritis                                                          | 1(2%)             | 0(0%)             | 0(0%)          | 1(1%)        | 1.00            |
| <b>Cohort 1b-14d-8m</b>                                                    |                   |                   |                |              |                 |
| <b>No of participants</b>                                                  | <b>60</b>         | <b>60</b>         | <b>30</b>      | <b>150</b>   | <b>—</b>        |
| <b>Total</b>                                                               | <b>2(3%)</b>      | <b>2(3%)</b>      | <b>0(0%)</b>   | <b>4(3%)</b> | <b>0.69</b>     |
| <b>Injury, poisoning and procedural complications</b>                      |                   |                   |                |              |                 |
| Soft tissue injury                                                         | 0(0%)             | 1(1%)             | 0(0%)          | 1(1%)        | 1.00            |
| Hand fracture                                                              | 1(2%)             | 0(0%)             | 0(0%)          | 1(1%)        | 1.00            |
| Nail injury                                                                | 1(2%)             | 0(0%)             | 0(0%)          | 1(1%)        | 1.00            |
| <b>Gastroesophageal reflux disease</b>                                     |                   |                   |                |              |                 |
| Hemorrhoid                                                                 | 1(2%)             | 0(0%)             | 0(0%)          | 1(1%)        | 1.00            |
| <b>Renal and urinary disorders</b>                                         |                   |                   |                |              |                 |
| Cystitis glandularis                                                       | 0(0%)             | 1(2%)             | 0(0%)          | 1(1%)        | 1.00            |
| <b>Cohort 2a-28d-2m</b>                                                    |                   |                   |                |              |                 |
| <b>No of participants</b>                                                  | <b>60</b>         | <b>60</b>         | <b>30</b>      | <b>150</b>   | <b>—</b>        |
| <b>Total</b>                                                               | <b>0(0%)</b>      | <b>1(2%)</b>      | <b>0(0%)</b>   | <b>1(1%)</b> | <b>1.00</b>     |
| <b>Surgical and medical procedures</b>                                     |                   |                   |                |              |                 |
| Induced abortion                                                           | 0(0%)             | 1(2%)             | 0(0%)          | 1(1%)        | 1.00            |
| <b>Musculoskeletal and connective tissue disorders</b>                     |                   |                   |                |              |                 |
| Herniated intervertebral disc                                              | —                 | —                 | —              | —            | —               |
| <b>Cohort 2b-28d-8m</b>                                                    |                   |                   |                |              |                 |
| <b>No of participants</b>                                                  | <b>60</b>         | <b>60</b>         | <b>30</b>      | <b>150</b>   | <b>—</b>        |
| <b>Total</b>                                                               | <b>0(0%)</b>      | <b>1(2%)</b>      | <b>0(0%)</b>   | <b>1(1%)</b> | <b>1.00</b>     |

| <b>Adverse events (MedDRA 23.0)</b>                    | <b>3 µg group</b> | <b>6 µg group</b> | <b>Placebo</b> | <b>Total</b> | <b>P value*</b> |
|--------------------------------------------------------|-------------------|-------------------|----------------|--------------|-----------------|
| <b>Surgical and medical procedures</b>                 |                   |                   |                |              |                 |
| Induced abortion                                       | 0(0%)             | 1(2%)             | 0(0%)          | 1(1%)        | 1.00            |
| <b>Musculoskeletal and connective tissue disorders</b> |                   |                   |                |              |                 |
| Herniated intervertebral disc                          | —                 | —                 | —              | —            | —               |

P value\* was calculated by Fisher exact probability method and of the comparison of incidence rate among three groups. Events occurred from immunization to 28 days post dose 3.

**Table S11. Serious adverse events reported in adults aged 60 years and older  
(cohort 3-28d-8m)**

| <b>Adverse Events<br/>(MedDRA 23.0)</b>                                    | <b>1.5 µg<br/>group<br/>(N=100)</b> | <b>3 µg<br/>group<br/>(N=101)</b> | <b>6 µg<br/>group<br/>(N=99)</b> | <b>Placebo<br/>group<br/>(N=49)</b> | <b>Total<br/>(N=349)</b> | <b>P value*</b> |
|----------------------------------------------------------------------------|-------------------------------------|-----------------------------------|----------------------------------|-------------------------------------|--------------------------|-----------------|
| <b>Total</b>                                                               | 10(10%)                             | 5(5%)                             | 7(7%)                            | 2(4%)                               | 24(7%)                   | 0.49            |
| <b>Nervous system disorders</b>                                            |                                     |                                   |                                  |                                     |                          |                 |
| Cerebral infarction                                                        | 1(1%)                               | 1(1%)                             | 0(0%)                            | 0(0%)                               | 2(1%)                    | 1.00            |
| Hypoxic-Ischemic<br>encephalopathy                                         | 1(1%)                               | 0(0%)                             | 1(1%)                            | 0(0%)                               | 2(1%)                    | 0.67            |
| Transient ischemic<br>attack                                               | 0(0%)                               | 1(1%)                             | 0(0%)                            | 0(0%)                               | 1(0%)                    | 1.00            |
| <b>Neoplasms benign, malignant and unspecified (incl cysts and polyps)</b> |                                     |                                   |                                  |                                     |                          |                 |
| Lung neoplasm                                                              | 1(1%)                               | 0(0%)                             | 0(0%)                            | 0(0%)                               | 1(0%)                    | 0.71            |
| Lung adenocarcinoma                                                        | 1(1%)                               | 0(0%)                             | 0(0%)                            | 0(0%)                               | 1(0%)                    | 0.71            |
| Liver cancer                                                               | 1(1%)                               | 0(0%)                             | 0(0%)                            | 0(0%)                               | 1(0%)                    | 0.71            |
| Kidney cyst                                                                | 1(1%)                               | 0(0%)                             | 0(0%)                            | 0(0%)                               | 1(0%)                    | 0.71            |
| Gastrointestinal<br>disorders                                              | 1(1%)                               | 1(1%)                             | 1(1%)                            | 1(2%)                               | 4(1%)                    | 0.84            |
| Duodenal Ulcer                                                             | 0(0%)                               | 0(0%)                             | 0(0%)                            | 1(2%)                               | 1(0%)                    | 0.14            |
| Gastrointestinal<br>perforation                                            | 1(1%)                               | 0(0%)                             | 0(0%)                            | 0(0%)                               | 1(0%)                    | 0.71            |
| Gastritis                                                                  | 0(0%)                               | 0(0%)                             | 1(1%)                            | 0(0%)                               | 1(0%)                    | 0.42            |
| Pancreatitis                                                               | 0(0%)                               | 1(1%)                             | 0(0%)                            | 0(0%)                               | 1(0%)                    | 1.00            |
| <b>Respiratory, thoracic and mediastinal disorders</b>                     |                                     |                                   |                                  |                                     |                          |                 |
| Pulmonary<br>inflammation                                                  | 0(0%)                               | 0(0%)                             | 1(1%)                            | 0(0%)                               | 1(0%)                    | 0.42            |
| Pulmonary<br>emphysema                                                     | 1(1%)                               | 0(0%)                             | 0(0%)                            | 0(0%)                               | 1(0%)                    | 0.71            |
| Chronic obstructive<br>pulmonary disease                                   | 0(0%)                               | 0(0%)                             | 1(1%)                            | 0(0%)                               | 1(0%)                    | 0.42            |
| <b>Cardiac disorders</b>                                                   |                                     |                                   |                                  |                                     |                          |                 |
| Unstable angina<br>pectoris                                                | 2(2%)                               | 0(0%)                             | 0(0%)                            | 0(0%)                               | 2(1%)                    | 0.42            |
| Atrial fibrillation                                                        | 1(1%)                               | 0(0%)                             | 0(0%)                            | 0(0%)                               | 1(0%)                    | 0.71            |
| <b>Musculoskeletal and connective tissue disorders</b>                     |                                     |                                   |                                  |                                     |                          |                 |
| Osteoarthritis                                                             | 0(0%)                               | 0(0%)                             | 1(1%)                            | 0(0%)                               | 1(0%)                    | 0.42            |
| Lumbar spinal stenosis                                                     | 0(0%)                               | 0(0%)                             | 1(1%)                            | 0(0%)                               | 1(0%)                    | 0.42            |
| <b>Vascular and lymphatic diseases</b>                                     |                                     |                                   |                                  |                                     |                          |                 |
| Hypertension                                                               | 0(0%)                               | 1(1%)                             | 1(1%)                            | 0(0%)                               | 2(1%)                    | 0.83            |
| <b>Hepatobiliary disease</b>                                               |                                     |                                   |                                  |                                     |                          |                 |
| Acute cholecystitis                                                        | 0(0%)                               | 0(0%)                             | 1(1%)                            | 0(0%)                               | 1(0%)                    | 0.42            |
| <b>Infection and infectious diseases</b>                                   |                                     |                                   |                                  |                                     |                          |                 |
| Bronchitis                                                                 | 1(1%)                               | 0(0%)                             | 0(0%)                            | 0(0%)                               | 1(0%)                    | 0.71            |



| <b>Adverse Events<br/>(MedDRA 23.0)</b>              | <b>1.5 µg<br/>group<br/>(N=100)</b> | <b>3 µg<br/>group<br/>(N=101)</b> | <b>6 µg<br/>group<br/>(N=99)</b> | <b>Placebo<br/>group<br/>(N=49)</b> | <b>Total<br/>(N=349)</b> | <b>P value*</b> |
|------------------------------------------------------|-------------------------------------|-----------------------------------|----------------------------------|-------------------------------------|--------------------------|-----------------|
| <b>Injury, poisoning and operative complications</b> |                                     |                                   |                                  |                                     |                          |                 |
| Tibial fracture                                      | 1(1%)                               | 0(0%)                             | 0(0%)                            | 0(0%)                               | 1(0%)                    | 0.71            |
| <b>Surgical and medical procedures</b>               |                                     |                                   |                                  |                                     |                          |                 |
| Hip arthroplasty                                     | 0(0%)                               | 1(1%)                             | 0(0%)                            | 0(0%)                               | 1(0%)                    | 1.00            |
| <b>Reproductive system and breast disease</b>        |                                     |                                   |                                  |                                     |                          |                 |
| Benign prostatic hyperplasia                         | 0(0%)                               | 0(0%)                             | 0(0%)                            | 1(2%)                               | 1(0%)                    | 0.14            |

P value\* was calculated by Fisher exact probability method and of the comparison of incidence rate among four groups. Events occurred from immunization to 28 days post dose 3.
